# Supplementary material for: The effect of photoanode structure on the performances of quantum-dot-sensitized solar cells: a case study of the anatase TiO2nanocrystals and polydisperse mesoporous spheres hybrid photoanodes
Source: Royal Society of Chemistry journal article supplement (doi:10.1039/c4ta02871f), 2014-01-01
Supplement: c4ta02871f1.pdf [file c4ta02871f1.pdf]

## Electronic Supplementary Information

### The Effect of Photoanode Structures on the Performances of the Quantum-dot Sensitized Solar Cells: A Case Study of the Anatase TiO<sub>2</sub> Nanocrystals and Mesoporous Microspheres Hybrid Photoanodes

Dapeng Wu<sup>b</sup>, Xiaojuan Shi<sup>c</sup>, Hui Dong<sup>a</sup>, Feng Zhu<sup>a</sup>, Kai Jiang<sup>b\*</sup>, Dongsheng Xu<sup>a\*</sup>, Xicheng Ai<sup>c\*</sup> and Jianping Zhang<sup>c</sup>

<sup>a</sup> Beijing National Laboratory for Molecular Sciences, State Key Laboratory for Structural Chemistry of Unstable and Stable Species, College of Chemistry and Molecular Engineering, Peking University, Beijing 100871, P.R. China, Tel./Fax: 86-10-62760360, E-mail: [dsxu@pku.edu.cn](mailto:dsxu@pku.edu.cn)

<sup>b</sup> School of Chemistry and Chemical Engineering, Henan Normal University, Henan Xinxiang 453007, P.R. China, Tel./Fax: 86-37-3326209, E-mail address: [jiangkai6898@126.com](mailto:jiangkai6898@126.com)

<sup>c</sup> Department of Chemistry, Renmin University of China, Beijing 100872, P. R. China, Tel./Fax: 86-10-62511528, E-mail address: [xcai@chem.ruc.edu.cn](mailto:xcai@chem.ruc.edu.cn)

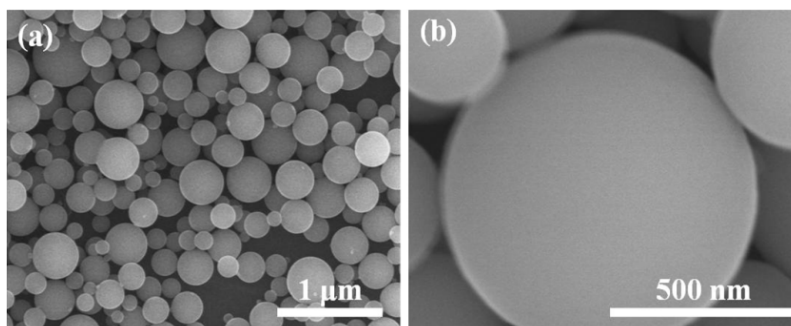

**Figure S1** SEM images with (a) low and (b) high magnifications of the amorphous intermediate product collected at after 30 min hydrothermal reaction.

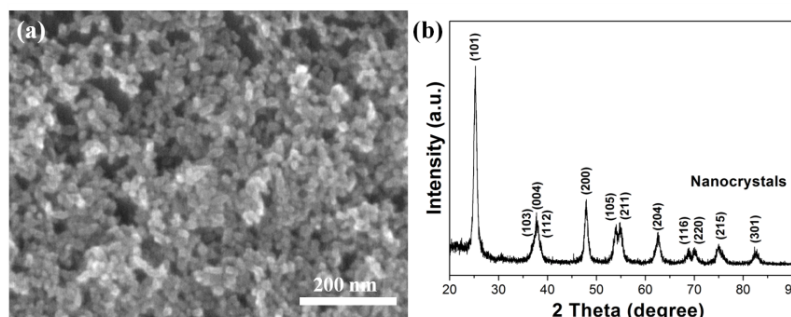

**Figure S2** (a) SEM image and (b) XRD pattern of the as-prepared nanocrystals.
